# Supplementary material for: Valley Fever: Environmental Risk Factors and Exposure Pathways Deduced from Field Measurements in California
Source: PubMed Central journal article supplement (PMC7432779; doi:10.3390/ijerph17155285), 2020-07-22
Supplement: ijerph-17-05285-s001.pdf [file ijerph-17-05285-s001.pdf]

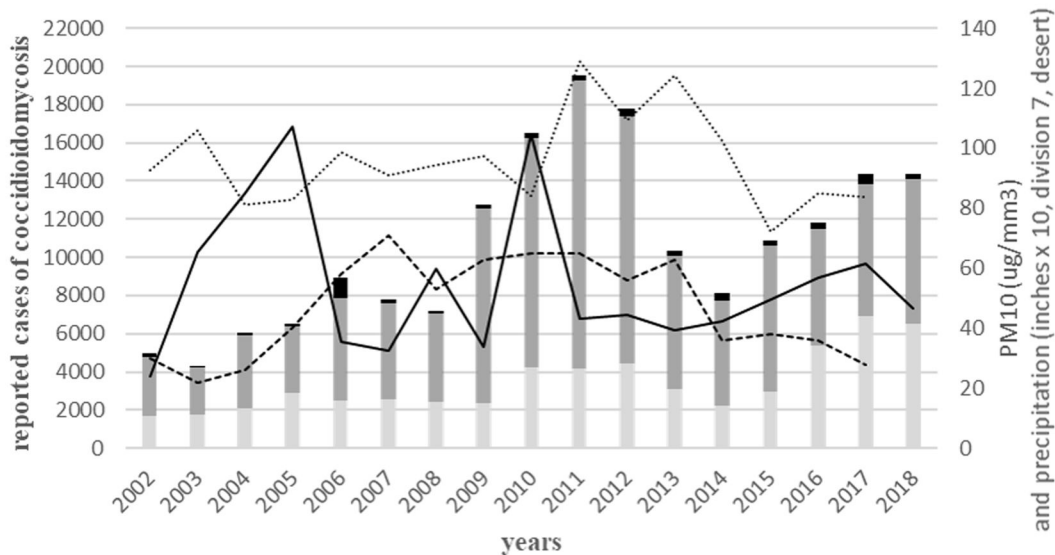

other states

AZ

CA

reported cases among active component of U.S. military 2002-2017

SW U.S. PM10 (ug/mm3) max 24-h av.

Precip Dec/Jan (inches) (climate division 7, desert) X10
